# Supplementary material
Source: PubMed Central journal article supplement (PMC9047536)
Supplement: NIHMS1795909-supplement-Data_file_S1.pdf [file NIHMS1795909-supplement-Data_file_S1.pdf]

**Fig. 1B**

|                     | 2 DPI      |            |            |            |            |
|---------------------|------------|------------|------------|------------|------------|
| WT                  | 9.21858554 | 9.63729813 | 9.63940818 | 9.06294408 | 7.71600334 |
| Rag1 <sup>-/-</sup> | 9.79620285 | 10.2245072 | 10.1616375 |            |            |
| μMT                 | 8.75266695 | 9.51744186 | 9.36686854 | 9.48679619 | 7.39682636 |

**Fig. 1C**

|                     | 2 DPI      |            |            |            |            |
|---------------------|------------|------------|------------|------------|------------|
| WT                  | 4.64345268 | 5.14612804 | 5.17609126 | 6.14612804 | 6.07918125 |
| Rag1 <sup>-/-</sup> | 4.34242268 | 5.41497335 | 5.17609126 |            |            |
| μMT                 | 6          | 6.04139269 | 6.2787536  | 5.77815125 | 5.95424251 |

4 [

|            |            |            |            |            |            |            |
|------------|------------|------------|------------|------------|------------|------------|
| 7.5797836  |            |            | 9.37791604 | 9.30863899 | 9.35096752 | 9.62324929 |
|            |            |            | 7.71038927 | 8.28851482 | 9.70217553 | 9.84766468 |
| 8.12179797 | 9.69037191 | 9.62895796 | 9.51195703 | 9.53881887 | 9.52574905 | 9.82318767 |

4 [

|            |  |  |             |            |            |            |
|------------|--|--|-------------|------------|------------|------------|
| 5.25527251 |  |  | 4.602059994 | 9.5424251  | 5.462398   | 5.23044892 |
|            |  |  | 4.47712125  | 4.53147892 |            |            |
| 6.25527251 |  |  | 5.07918125  | 4.77815125 | 5.14612804 | 5.462398   |

PI

|            |            |            |            |            |            |            |
|------------|------------|------------|------------|------------|------------|------------|
| 9.73239376 |            |            |            | 6.59186147 | 7.61929558 | 8.58082793 |
|            |            |            |            | 9.57165836 | 8.63691932 | 9.37244115 |
| 10.0562186 | 9.88935047 | 10.0562949 | 10.1045554 | 7.96232685 | 7.73876265 | 6.22431553 |

PI

|            |            |            |            |            |            |            |
|------------|------------|------------|------------|------------|------------|------------|
|            |            |            |            | 0          | 0          | 0          |
|            |            |            |            | 4.14612804 | 3.67209786 | 5.43136376 |
| 4.84509804 | 5.07918125 | 4.90308999 | 5.14612804 | 2.47712125 | 2.47712125 | 2.30103    |

7DPI

|            |            |            |            |           |            |            |
|------------|------------|------------|------------|-----------|------------|------------|
| 7.71600334 | 7.5797836  | 7.64942471 |            |           | 5.50441812 | 6.16565261 |
| 10.2172207 |            |            |            |           | 9.40406325 | 9.78412395 |
| 5.34813958 | 5.72898517 | 6.38650718 | 8.49642344 | 8.5797836 | 6.90459621 | 6.92572932 |

7DPI

|            |   |   |   |   |            |         |
|------------|---|---|---|---|------------|---------|
| 0          |   |   |   |   | 0          | 0       |
|            |   |   |   |   | 3.84509804 | 3.69897 |
| 2.47712125 | 0 | 0 | 0 | 0 | 0          | 0       |

| 14DPI      |            |            |            |           |            | P value |
|------------|------------|------------|------------|-----------|------------|---------|
| 4.81981337 | 5.5727616  |            |            |           |            |         |
| 9.91022936 | 9.89155971 | 9.51890334 |            |           |            | <0.0001 |
| 7.21562198 | 6.7840079  | 6.7369961  | 7.21837754 | 6.6628862 | 7.02874807 | 0.0059  |

| 14DPI    |            |           |   |   |   |
|----------|------------|-----------|---|---|---|
| 0        | 0          | 0         | 0 | 0 |   |
| 4.698974 | 7.78151254 | 6.0205999 |   |   |   |
| 0        | 0          | 0         | 0 | 0 | 0 |

**Fig. 2B**

|        |            |            |            |            |            |
|--------|------------|------------|------------|------------|------------|
| PBS    | 6.79748612 | 6.12813    | 7.15848713 | 5.90585615 | 7.3382956  |
| αCD8   | 7.64575138 | 7.68781899 | 7.42651411 | 7.25647403 | 7.62178703 |
| αCD4   | 7.6853717  | 7.72115185 | 7.70922695 | 7.65023258 | 7.62865744 |
| αCD8/4 | 8.56237905 | 8.61260946 | 7.7249468  | 8.08666331 | 8.4310701  |

**Fig. 2C**

|        |            |            |            |   |            |
|--------|------------|------------|------------|---|------------|
| PBS    | 0          | 0          | 0          | 0 | 0          |
| αCD8   | 0          | 0          | 0          | 0 | 0          |
| αCD4   | 0          | 0          | 0          | 0 | 0          |
| αCD8/4 | 2.77815125 | 3.04139269 | 3.38021124 | 0 | 2.60205999 |

**Fig. 2D**

|        |            |            |            |            |            |
|--------|------------|------------|------------|------------|------------|
| PBS    | 6.43693789 | 6.27478957 | 6.96697248 | 7.00695334 | 6.90459621 |
| αCD8   | 9.00917989 | 8.80767598 | 9.09311918 | 9.19040564 | 7.73200745 |
| αCD4   | 7.23363007 | 7.22677773 | 7.81597167 | 7.75029034 | 7.14961235 |
| αCD8/4 | 9.66407105 | 9.66265273 | 9.27432895 | 9.40361954 | 9.01913374 |

**Fig. 2E**

|        |            |            |            |            |            |
|--------|------------|------------|------------|------------|------------|
| PBS    | 0          | 0          | 0          | 0          | 0          |
| αCD8   | 3.87506126 | 2.90308999 | 4.53147892 | 4.14612804 | 0          |
| αCD4   | 2.47712125 | 0          | 3.17609126 | 2.30103    | 0          |
| αCD8/4 | 5.04139269 | 4.90308999 | 4.83250891 | 4.74818803 | 3.72427587 |

|            |            |            | P value |
|------------|------------|------------|---------|
| 7.09674454 | 5.3837647  |            |         |
| 7.56018988 |            |            | 0.0044  |
| 7.42004874 |            |            | 0.0017  |
| 8.60876727 | 7.76080793 | 7.48225881 | <0.0001 |

|   |            |   | P value |
|---|------------|---|---------|
| 0 | 0          |   |         |
| 0 |            |   | >0.9999 |
| 0 |            |   | >0.9999 |
| 0 | 3.11394335 | 0 | 0.0019  |

|            |            |           |           |             |           |            |
|------------|------------|-----------|-----------|-------------|-----------|------------|
| 6.92572932 | 7.21562198 | 6.7840079 | 6.7369961 | 7.218377539 | 6.6628862 | 7.02874807 |
| 8.04378259 |            |           |           |             |           |            |
| 7.15308961 |            |           |           |             |           |            |
| 9.14807469 |            |           |           |             |           |            |

|   |   |   |
|---|---|---|
| 0 | 0 | 0 |
| 0 |   |   |
| 0 |   |   |

|                                 | P value |
|---------------------------------|---------|
| PBS vs. $\alpha$ CD4            | 0.0342  |
| PBS vs. $\alpha$ CD8            | <0.0001 |
| PBS vs. $\alpha$ CD4/8          | <0.0001 |
| $\alpha$ CD4 vs. $\alpha$ CD8   | <0.0001 |
| $\alpha$ CD4 vs. $\alpha$ CD4/8 | <0.0001 |
| $\alpha$ CD8 vs. $\alpha$ CD4/8 | 0.0127  |

|                                 | P value |
|---------------------------------|---------|
| PBS vs. $\alpha$ CD4            | 0.233   |
| PBS vs. $\alpha$ CD8            | 0.0049  |
| PBS vs. $\alpha$ CD4/8          | <0.0001 |
| $\alpha$ CD4 vs. $\alpha$ CD8   | 0.333   |
| $\alpha$ CD4 vs. $\alpha$ CD4/8 | 0.0014  |
| $\alpha$ CD8 vs. $\alpha$ CD4/8 | 0.0703  |

**Fig. 3B**

|         |            |            |            |            |            |
|---------|------------|------------|------------|------------|------------|
| Control | 9.18667859 | 9.27106308 | 9.32167804 | 9.03471639 | 9.04718746 |
| T cell  | 9.21020122 | 9.01627029 | 8.69561603 | 8.8654751  | 8.16606238 |
| Serum   | 7.70613215 | 7.65141853 | 7.66306872 | 7.73530742 | 6.13218874 |

**Fig. 3C**

|         |            |            |            |            |            |
|---------|------------|------------|------------|------------|------------|
| Control | 4.50514998 | 4.38021124 | 4.64345268 | 3.23044892 | 3.36172784 |
| T cell  | 0          | 0          | 0          | 0          | 3.38021124 |
| Serum   | 0          | 0          | 0          | 0          | 0          |

9.211126 9.08476323 9.38492276  
9.11847793 8.64462062 7.8285908 8.02419569 8.03046409 8.52175946 8.89308865  
6.04194576 7.03004066 7.20935917 8.48871941 8.42202473 8.05450375 8.19163373

3.65321251 4.66275783 4.61278386  
2.69897 3.20411998 3.07918125 3.49136169 3.32221929 2.84509804 2.47712125  
0 0 0 0 0 0 0

P value

9.27960705

0.1

<0.0001

P value

2.69897

2.90308999

0.0001

0

0 <0.0001

**Fig. 4B**

| LN dilution | 1ug    |        |        |        |
|-------------|--------|--------|--------|--------|
| 4.31748811  | 2.3875 | 2.4092 | 2.4465 | 2.4007 |
| 5.99146455  | 2.3567 | 2.3604 | 2.4789 | 2.4884 |
| 7.09007684  | 2.4188 | 2.3729 | 2.3759 | 2.428  |
| 8.18868912  | 1.9285 | 1.7842 | 2.0464 | 2.2686 |
| 9.28730141  | 1.0442 | 1.3035 | 1.2134 | 1.9786 |
| 10.3859137  | 0.4689 | 0.4843 | 0.6243 | 0.986  |

**Fig. 4C**

|    | 1ug        |            |            |            |           |
|----|------------|------------|------------|------------|-----------|
| 0  | 100        | 100        | 100        | 100        | 100       |
| 1  | 100.420168 | 99.553571  | 101.904762 | 101.463415 | 98.598131 |
| 2  | 101.680672 | 101.785714 | 104.285714 | 103.414634 | 100       |
| 3  | 101.680672 | 100.446429 | 100.47619  | 102.926829 | 98.130841 |
| 4  | 102.521008 | 101.785714 | 103.333333 | 102.439024 | 98.598131 |
| 5  | 101.260504 | 104.464286 | 105.238095 | 101.95122  | 98.130841 |
| 6  | 100.8403   | 103.125    | 104.2857   | 102.439    | 86.9159   |
| 7  | 98.3193    | 102.2321   | 103.8095   | 103.4146   | 82.7103   |
| 8  | 100        | 102.232143 | 102.857143 | 100.487805 | 83.64486  |
| 9  | 98.739496  | 102.232143 | 100        | 100        | 84.11215  |
| 10 | 97.478992  | 102.232143 | 101.428571 | 99.512195  | 86.448598 |
| 11 | 97.058824  | 100.892857 | 101.428571 | 99.02439   | 87.383178 |
| 12 | 94.957983  | 100        | 100.47619  | 97.560976  | 88.317757 |
| 13 | 96.638655  | 102.232143 | 102.380952 | 101.463415 | 91.588785 |
| 14 |            |            |            |            |           |
| 15 | 96.218487  | 103.571429 | 99.047619  | 99.02439   | 92.056075 |

**Fig. 4D**

|    | 1ug | 0.3ug | 0.1ug | 0.03 |
|----|-----|-------|-------|------|
| 15 | 0   |       |       |      |
| 15 | 0   |       |       |      |
| 15 | 0   |       |       |      |
| 15 | 0   |       |       |      |
| 15 | 0   |       |       |      |
| 15 |     | 0     |       |      |
| 15 |     | 0     |       |      |
| 15 |     | 0     |       |      |
| 15 |     | 0     |       |      |
| 15 |     | 0     |       |      |
| 15 |     |       | 0     |      |
| 7  |     |       | 1     |      |
| 9  |     |       | 1     |      |
| 7  |     |       | 1     |      |
| 15 |     |       | 0     |      |
| 6  |     |       |       | 1    |
| 8  |     |       |       | 1    |
| 7  |     |       |       | 1    |
| 7  |     |       |       | 1    |

8  
7  
8  
6  
8  
7  
7  
6  
7  
6

1

**Fig. 4E**

|                         |          |         |          |         |         |  |
|-------------------------|----------|---------|----------|---------|---------|--|
|                         |          |         |          | 1ug     |         |  |
| S1 IgG AUC              | 11.45    | 11.55   | 12.02    | 13.33   | 10.81   |  |
| % Starting weight Day 6 | 100.8403 | 103.125 | 104.2857 | 102.439 | 86.9159 |  |

**Fig. 4F**

|            |       |       |       |      |        |  |
|------------|-------|-------|-------|------|--------|--|
| S1 IgG AUC | 7.053 | 4.581 | 9.565 | 7.61 | 0.1871 |  |
|------------|-------|-------|-------|------|--------|--|

**Fig. 4G**

|                         |          |         |         |         |         |  |
|-------------------------|----------|---------|---------|---------|---------|--|
|                         |          |         | 1ug     |         |         |  |
| IC50                    | 250.4    | 453.3   | 587.3   | 10      | 105.6   |  |
| % Starting weight Day 6 | 100.8403 | 103.125 | 102.439 | 86.9159 | 86.1607 |  |

b

|      |    |       |    |    |    |  |
|------|----|-------|----|----|----|--|
| IC50 | 10 | 20.31 | 10 | 10 | 10 |  |
|------|----|-------|----|----|----|--|

|        |        |        |        |        |        |        |  |
|--------|--------|--------|--------|--------|--------|--------|--|
|        |        |        | 0.3ug  |        |        |        |  |
| 2.3969 | 2.3386 | 2.372  | 2.3926 | 2.3825 | 2.3949 | 2.3224 |  |
| 2.4443 | 2.3932 | 2.2826 | 2.4486 | 2.3317 | 2.4393 | 2.2691 |  |
| 2.2555 | 2.1843 | 2.1111 | 2.2245 | 1.9307 | 2.1682 | 1.7578 |  |
| 1.669  | 1.528  | 1.461  | 1.7873 | 1.1024 | 1.5776 | 1.1026 |  |
| 0.807  | 0.94   | 0.8642 | 1.1341 | 0.5559 | 1.0969 | 0.5758 |  |
| 0.3887 | 0.3209 | 0.3074 | 0.3924 | 0.1654 | 0.4017 | 0.1935 |  |

|            |            |            |            |            |            |            |     |
|------------|------------|------------|------------|------------|------------|------------|-----|
|            |            | 0.3ug      |            |            |            |            |     |
| 100        | 100        | 100        | 100        | 100        | 100        | 100        | 100 |
| 100.446429 | 100        | 101.401869 | 103.045685 | 100.485437 | 100.884956 | 101.010101 |     |
| 101.339286 | 101.694915 | 102.803738 | 101.522843 | 101.941748 | 100        | 102.525253 |     |
| 99.553571  | 100        | 99.53271   | 98.477157  | 100        | 98.230088  | 99.494949  |     |
| 93.75      | 100        | 102.336449 | 101.015228 | 100        | 100        | 95.959596  |     |
| 91.071429  | 100.423729 | 103.738318 | 102.030457 | 100.970874 | 94.247788  | 91.919192  |     |
| 86.1607    | 101.6949   | 102.8037   | 101.0152   | 101.9417   | 89.823     | 85.3535    |     |
| 79.0179    | 101.2712   | 103.271    | 101.5228   | 101.9417   | 82.7434    | 78.2828    |     |
| 80.803571  | 98.728814  | 101.869159 | 101.522843 | 103.398058 | 85.840708  |            |     |
| 87.946429  | 98.728814  | 103.271028 | 102.030457 | 100.485437 | 88.938053  |            |     |
| 88.392857  | 100.423729 | 100        | 102.030457 | 100.970874 | 94.690265  |            |     |
| 87.5       | 99.576271  | 100.46729  | 99.492386  | 100.485437 | 96.017699  |            |     |
| 88.839286  | 100.847458 | 99.065421  | 100.507614 | 100        | 95.575221  |            |     |
| 89.732143  | 101.271186 | 99.53271   | 103.045685 | 103.398058 | 95.575221  |            |     |
| 91.517857  | 102.542373 | 100        | 104.060914 | 100        | 94.247788  |            |     |

0.01ug      Mock

|                |                    |
|----------------|--------------------|
|                | P value (Log Rank) |
| Mock vs 1ug    | 0.0031             |
| Mock vs 0.3ug  | 0.0031             |
| Mock vs 0.1ug  | 0.029              |
| Mock vs 0.03ug | 0.1729             |
| Mock vs 0.01ug | 0.1726             |
| 1ug vs 0.3ug   | >0.9999            |
| 1ug vs 0.1ug   | 0.0486             |
| 0.3ug vs 0.1ug | 0.0486             |

1  
1  
1  
1

1  
1  
1  
1  
1

|         |          |          |          |          |        |         |
|---------|----------|----------|----------|----------|--------|---------|
|         |          | 0.3ug    |          |          |        |         |
| 10.56   | 10.19    | 11.27    | 9.26     | 10.93    | 8.971  | 7.053   |
| 86.1607 | 101.6949 | 102.8037 | 101.0152 | 101.9417 | 89.823 | 85.3535 |

|       |       |       |       |         |        |         |
|-------|-------|-------|-------|---------|--------|---------|
|       | Death |       |       |         |        |         |
| 2.832 | 4.211 | 1.133 | 4.304 | 0.08112 | 0.1134 | 0.06268 |

|          |          |          |        |         |         |       |
|----------|----------|----------|--------|---------|---------|-------|
| 0.3ug    |          |          |        | 0.1ug   |         |       |
| 142.9    | 108.5    | 10       | 10     | 20.31   | 10      | 10    |
| 101.6949 | 102.8037 | 101.9417 | 89.823 | 85.3535 | 81.8627 | 77.13 |

|       |    |    |    |    |    |    |
|-------|----|----|----|----|----|----|
| Death |    |    |    |    |    |    |
| 10    | 10 | 10 | 10 | 10 | 10 | 10 |

|        | 0.1ug  |        |        |        | 0.03ug |        |  |
|--------|--------|--------|--------|--------|--------|--------|--|
| 2.3694 | 2.129  | 2.5564 | 2.4855 | 0.1147 | 1.6384 | 2.1112 |  |
| 1.962  | 1.1808 | 2.209  | 1.9228 | 0.0377 | 0.6755 | 0.9632 |  |
| 1.2627 | 0.6675 | 1.9921 | 1.5063 | 0.0161 | 0.3084 | 0.6412 |  |
| 0.5887 | 0.2647 | 1.3354 | 0.7407 | 0.0098 | 0.1149 | 0.2697 |  |
| 0.2311 | 0.1147 | 0.5471 | 0.3252 | 0.0052 | 0.0477 | 0.0811 |  |
| 0.1125 | 0.0225 | 0.1932 | 0.0693 | 0.0085 | 0.013  | 0.0352 |  |

| 0.1ug      |            |            | 0.03ug     |            |            |           |
|------------|------------|------------|------------|------------|------------|-----------|
| 100        | 100        | 100        | 100        | 100        | 100        | 100       |
| 101.960784 | 97.757848  | 103.167421 | 100.884956 | 100.917431 | 101.421801 | 97.272727 |
| 100.490196 | 102.242152 | 101.809955 | 102.654867 | 99.082569  | 101.421801 | 99.090909 |
| 99.509804  | 95.964126  | 99.095023  | 99.115044  | 90.366972  | 99.526066  | 95.454545 |
| 98.529412  | 89.686099  | 97.285068  | 92.035398  | 88.990826  | 94.312796  | 85.454545 |
| 89.215686  | 84.753363  | 87.782805  | 84.070796  | 88.990826  | 85.308057  | 79.545455 |
| 81.8627    | 77.13      | 82.3529    | 77.4336    | 79.8165    | 81.0427    | 75.4545   |
| 78.9216    | 73.991     | 82.8054    |            | 75.6881    | 76.7773    | 73.6364   |
| 75.980392  |            | 84.615385  |            | 71.100917  |            |           |
| 74.019608  |            | 88.687783  |            |            |            |           |
|            |            | 91.855204  |            |            |            |           |
|            |            | 97.737557  |            |            |            |           |
|            |            | 95.927602  |            |            |            |           |
|            |            | 98.190045  |            |            |            |           |
|            |            | 97.737557  |            |            |            |           |

|         |       |         |         |         |         |         |
|---------|-------|---------|---------|---------|---------|---------|
| 0.1ug   |       |         |         |         | 0.03ug  |         |
| 4.581   | 9.565 | 7.61    | 0.1871  | 2.832   | 4.211   | 1.133   |
| 81.8627 | 77.13 | 82.3529 | 77.4336 | 79.8165 | 81.0427 | 75.4545 |

|        |       |       |       |       |       |       |
|--------|-------|-------|-------|-------|-------|-------|
| 0.1048 | 11.45 | 11.55 | 12.02 | 13.33 | 10.81 | 10.56 |
|--------|-------|-------|-------|-------|-------|-------|

|         |         |         |         |         |         |         |
|---------|---------|---------|---------|---------|---------|---------|
|         |         |         | 0.03ug  |         |         |         |
| 10      | 10      | 10      | 10      | 10      | 10      | 10      |
| 82.3529 | 77.4336 | 79.8165 | 81.0427 | 75.4545 | 82.1429 | 77.2512 |

|       |       |       |    |          |       |       |
|-------|-------|-------|----|----------|-------|-------|
|       |       |       |    | Survival |       |       |
| 250.4 | 453.3 | 587.3 | 10 | 105.6    | 142.9 | 108.5 |

| 0.01ug |        |        |        |        |        |        |
|--------|--------|--------|--------|--------|--------|--------|
| 0.8192 | 2.0477 | 0.0389 | 0.0356 | 0.0599 | 0.0279 | 0.0692 |
| 0.2096 | 1.1452 | 0.1638 | 0.0144 | 0.0204 | 0.0105 | 0.0176 |
| 0.085  | 0.5873 | 0.0229 | 0.0097 | 0.012  | 0.0069 | 0.0072 |
| 0.0366 | 0.246  | 0.0123 | 0.0081 | 0.0088 | 0.0054 | 0.0051 |
| 0.0164 | 0.0671 | 0.0114 | 0.0074 | 0.007  | 0.0056 | 0.0053 |
| 0.0099 | 0.0234 | 0.0092 | 0.0067 | 0.0081 | 0.0093 | 0.0057 |

| 0.01ug     |            |            |            |            |           |
|------------|------------|------------|------------|------------|-----------|
| 100        | 100        | 100        | 100        | 100        | 100       |
| 101.785714 | 99.526066  | 100.440529 | 101.507538 | 99.528302  | 96.341463 |
| 100        | 103.791469 | 100.440529 | 102.512563 | 103.301887 | 95.934959 |
| 97.767857  | 100        | 98.678414  | 98.994975  | 98.113208  | 93.089431 |
| 91.964286  | 93.838863  | 96.475771  | 91.457286  | 93.867925  | 86.99187  |
| 82.589286  | 82.938389  | 89.867841  | 82.914573  | 86.792453  | 80.894309 |
| 82.1429    | 77.2512    | 82.3789    | 77.3869    | 79.717     | 76.4228   |
| 79.9107    | 75.3555    | 80.1762    |            | 75.4717    | 74.7967   |
| 78.125     |            | 78.854626  |            | 71.698113  | 73.170732 |

|         |         |         |         |        |         |         |
|---------|---------|---------|---------|--------|---------|---------|
|         |         |         | 0.01ug  |        |         |         |
| 4.304   | 0.08112 | 0.1134  | 0.06268 | 0.1048 | 0.2626  | 0.08488 |
| 82.1429 | 77.2512 | 82.3789 | 77.3869 | 79.717 | 76.4228 | 81.0811 |

|          |       |      |       |       |      |
|----------|-------|------|-------|-------|------|
| Survival |       |      |       |       |      |
| 10.19    | 11.27 | 9.26 | 10.93 | 8.971 | 7.61 |

|         |         |  |              |                  |                |
|---------|---------|--|--------------|------------------|----------------|
| 0.01ug  |         |  | Spearman r   |                  | P value        |
| 10      | 10      |  | r            | 0.7171           | P (two-tailed) |
| 82.3789 | 77.3869 |  | 95% confider | 0.4021 to 0.8804 |                |

|    |    |    |                 |       |
|----|----|----|-----------------|-------|
|    |    |    | Best-fit values |       |
| 10 | 10 | 10 | X at 50%        | 31.13 |

| Mock   |        |        |        |        |
|--------|--------|--------|--------|--------|
| 0.2213 | 0.0393 | 0.0735 | 0.1431 | 0.0691 |
| 0.0315 | 0.0142 | 0.0158 | 0.027  | 0.0216 |
| 0.0135 | 0.0113 | 0.0119 | 0.0152 | 0.0128 |
| 0.0067 | 0.0076 | 0.0097 | 0.0082 | 0.0069 |
| 0.0073 | 0.0067 | 0.0074 | 0.0065 | 0.0058 |
| 0.0063 | 0.0076 | 0.007  | 0.0081 | 0.0072 |

| Mock      |           |           |           |
|-----------|-----------|-----------|-----------|
| 100       | 100       | 100       | 100       |
| 99.099099 | 99.568966 | 96.428571 | 98.283262 |
| 99.54955  | 100       | 97.619048 | 98.283262 |
| 100       | 96.551724 | 94.84127  | 95.27897  |
| 96.846847 | 89.224138 | 90.079365 | 88.412017 |
| 87.837838 | 80.172414 | 81.746032 | 77.682403 |
| 81.0811   | 78.8793   | 80.9524   | 76.3949   |
| 78.8288   |           | 79.3651   |           |
|           |           | 77.777778 |           |

Mock

0.1191    0.1945    0.1197  
78.8793    80.9524    76.3949

Spearman r

r                    0.7936  
95% confidence interval 0.5950 to 0.9009

Best-fit values

X at 50%            7.882

0.0003



P value

P (two-tailed) <0.0001

## 2 way ANOVA with Tukey's multiple comparisons test

| DPI |                   | P value |
|-----|-------------------|---------|
| 1   | 1ug vs. 0.3ug     | 0.9497  |
|     | 1ug vs. 0.1ug     | 0.9932  |
|     | 1ug vs. 0.03ug    | >0.9999 |
|     | 1ug vs. 0.01ug    | >0.9999 |
|     | 1ug vs. Mock      | 0.1766  |
|     | 0.3ug vs. 0.1ug   | >0.9999 |
|     | 0.3ug vs. 0.03ug  | 0.9843  |
|     | 0.3ug vs. 0.01ug  | 0.8473  |
|     | 0.3ug vs. Mock    | 0.0539  |
|     | 0.1ug vs. 0.03ug  | 0.9978  |
|     | 0.1ug vs. 0.01ug  | 0.9756  |
|     | 0.1ug vs. Mock    | 0.1868  |
|     | 0.03ug vs. 0.01ug | 0.9999  |
|     | 0.03ug vs. Mock   | 0.2675  |
|     | 0.01ug vs. Mock   | 0.1677  |
| 2   | 1ug vs. 0.3ug     | 0.9952  |
|     | 1ug vs. 0.1ug     | 0.9303  |
|     | 1ug vs. 0.03ug    | 0.5413  |
|     | 1ug vs. 0.01ug    | 0.9997  |
|     | 1ug vs. Mock      | 0.0409  |
|     | 0.3ug vs. 0.1ug   | 0.9573  |
|     | 0.3ug vs. 0.03ug  | 0.4897  |
|     | 0.3ug vs. 0.01ug  | 0.9447  |
|     | 0.3ug vs. Mock    | 0.0357  |
|     | 0.1ug vs. 0.03ug  | 0.8573  |
|     | 0.1ug vs. 0.01ug  | 0.8078  |
|     | 0.1ug vs. Mock    | 0.0644  |
|     | 0.03ug vs. 0.01ug | 0.414   |
|     | 0.03ug vs. Mock   | 0.347   |
|     | 0.01ug vs. Mock   | 0.0364  |
| 3   | 1ug vs. 0.3ug     | 0.7054  |
|     | 1ug vs. 0.1ug     | 0.3359  |
|     | 1ug vs. 0.03ug    | 0.3199  |
|     | 1ug vs. 0.01ug    | 0.4323  |
|     | 1ug vs. Mock      | 0.078   |
|     | 0.3ug vs. 0.1ug   | 0.6984  |

|                   |        |
|-------------------|--------|
| 0.3ug vs. 0.03ug  | 0.5427 |
| 0.3ug vs. 0.01ug  | 0.836  |
| 0.3ug vs. Mock    | 0.181  |
| 0.1ug vs. 0.03ug  | 0.8579 |
| 0.1ug vs. 0.01ug  | 0.9842 |
| 0.1ug vs. Mock    | 0.4839 |
| 0.03ug vs. 0.01ug | 0.7055 |
| 0.03ug vs. Mock   | 0.9998 |
| 0.01ug vs. Mock   | 0.2904 |

4

|                   |         |
|-------------------|---------|
| 1ug vs. 0.3ug     | 0.7446  |
| 1ug vs. 0.1ug     | 0.1957  |
| 1ug vs. 0.03ug    | 0.0047  |
| 1ug vs. 0.01ug    | 0.0069  |
| 1ug vs. Mock      | 0.0082  |
| 0.3ug vs. 0.1ug   | 0.753   |
| 0.3ug vs. 0.03ug  | 0.0257  |
| 0.3ug vs. 0.01ug  | 0.1261  |
| 0.3ug vs. Mock    | 0.0317  |
| 0.1ug vs. 0.03ug  | 0.2474  |
| 0.1ug vs. 0.01ug  | 0.8417  |
| 0.1ug vs. Mock    | 0.253   |
| 0.03ug vs. 0.01ug | 0.5097  |
| 0.03ug vs. Mock   | >0.9999 |
| 0.01ug vs. Mock   | 0.5218  |

5

|                   |        |
|-------------------|--------|
| 1ug vs. 0.3ug     | 0.9016 |
| 1ug vs. 0.1ug     | 0.0033 |
| 1ug vs. 0.03ug    | 0.0002 |
| 1ug vs. 0.01ug    | 0.0018 |
| 1ug vs. Mock      | 0.0002 |
| 0.3ug vs. 0.1ug   | 0.0557 |
| 0.3ug vs. 0.03ug  | 0.0054 |
| 0.3ug vs. 0.01ug  | 0.0125 |
| 0.3ug vs. Mock    | 0.0023 |
| 0.1ug vs. 0.03ug  | 0.2522 |
| 0.1ug vs. 0.01ug  | 0.5799 |
| 0.1ug vs. Mock    | 0.0734 |
| 0.03ug vs. 0.01ug | 0.9802 |
| 0.03ug vs. Mock   | 0.8836 |

0.01ug vs. Mock 0.5894

6

|                   |         |
|-------------------|---------|
| 1ug vs. 0.3ug     | >0.9999 |
| 1ug vs. 0.1ug     | 0.0301  |
| 1ug vs. 0.03ug    | 0.012   |
| 1ug vs. 0.01ug    | 0.0123  |
| 1ug vs. Mock      | 0.0121  |
| 0.3ug vs. 0.1ug   | 0.0361  |
| 0.3ug vs. 0.03ug  | 0.0133  |
| 0.3ug vs. 0.01ug  | 0.0137  |
| 0.3ug vs. Mock    | 0.0133  |
| 0.1ug vs. 0.03ug  | 0.5714  |
| 0.1ug vs. 0.01ug  | 0.572   |
| 0.1ug vs. Mock    | 0.4572  |
| 0.03ug vs. 0.01ug | >0.9999 |
| 0.03ug vs. Mock   | 0.9997  |
| 0.01ug vs. Mock   | 0.9997  |

Fig. 5B

|            |       |       |       |                 |
|------------|-------|-------|-------|-----------------|
| S1 IgG AUC | 17.38 | 18.13 | 16.37 | Vaccin<br>17.45 |
|------------|-------|-------|-------|-----------------|

Fig. 5C

|              |         |          |          |          |
|--------------|---------|----------|----------|----------|
|              | WA1     | 3.999218 | 4.101884 | 3.819676 |
| Vaccine      | B.1.351 | 3.953034 | 3.640183 | 3.49596  |
|              | WA1     | 3.499412 | 3.678882 | 3.269513 |
| Convalescent | B.1.351 | 3.349278 | 2.399501 | 3.083861 |

Fig. 5D

|   |            |          |          |               |
|---|------------|----------|----------|---------------|
|   | WA1+PBS    |          |          | Naïve<br>WA1+ |
| 0 | 1          | 1        | 1        | 1             |
| 1 |            |          |          |               |
| 2 | 1.01470588 | 1.010582 | 1.027149 | 1.018957      |
| 3 |            |          |          |               |
| 4 | 0.84803922 | 0.835979 | 0.904977 | 0.905213      |
| 5 |            |          |          |               |
| 6 |            |          |          |               |
| 7 |            |          |          |               |

Fig. 5E

|   |         |                  |           |           |
|---|---------|------------------|-----------|-----------|
|   | WA1+PBS | Naïve<br>WA1+aCD | B.1.351+P | B.1.351+a |
| 4 |         | 1                | 1         | 1         |
| 4 |         | 1                | 1         | 1         |
| 4 |         | 1                |           | 1         |
| 7 |         |                  |           |           |
| 7 |         |                  |           |           |
| 7 |         |                  |           |           |
| 7 |         |                  |           |           |
| 7 |         |                  |           |           |
| 7 |         |                  |           |           |

Fig. 5F

|            |            |          |          |          |
|------------|------------|----------|----------|----------|
|            | WA1+PBS    |          | Naïve    |          |
| 9.08989319 | 8.56884721 | 9.280519 | 9.216226 | 9.356341 |

|              |                             | P value |
|--------------|-----------------------------|---------|
| Naïve        | WA1+PBS vs B.1.351+PBS      | 0.9979  |
| Convalescent | WA1+PBS vs WA1+aCD8         | 0.9849  |
| Convalescent | WA1+PBS vs B.1.351+PBS      | 0.1663  |
| Convalescent | WA1+aCD8 vs B.1.351+aCD8    | <0.0001 |
| Convalescent | B.1.351+PBS vs B.1.351+aCD8 | 0.0829  |
| Vaccine      | WA1+PBS vs WA1+aCD8         | 0.9985  |
| Vaccine      | WA1+PBS vs B.1.351+PBS      | <0.0001 |
| Vaccine      | WA1+aCD8 vs B.1.351+aCD8    | <0.0001 |
| Vaccine      | B.1.351+PBS vs B.1.351+aCD8 | 0.9979  |

**Fig. 5G**

|  | WA1+PBS     | Naïve                                  |
|--|-------------|----------------------------------------|
|  | 7.146128036 | 6.602059991 7.361728 6.963788 7.380211 |

e  
 14.19      17.54      17.96      16.05      17.9      12.88      14.2

|          |          |          |  |                                 |
|----------|----------|----------|--|---------------------------------|
| 4.237921 | 4.129561 | 3.964966 |  | Vaccine wa1 vs. Convalescent W  |
| 3.113275 | 3.561578 | 3.671358 |  | Vaccine wa1 vs. Vaccine B.1.351 |
| 3.885361 | 3.230449 | 2.967875 |  | Convalescent WA1 vs. Convalesc  |
| 3.078457 | 3.089552 | 3.17667  |  | Vaccine B.1.351 vs. Convalescer |

|      |          |             |          |              |          |          |          |
|------|----------|-------------|----------|--------------|----------|----------|----------|
| aCD8 |          | B.1.351+PBS |          | B.1.351+aCD8 |          |          |          |
|      | 1        | 1           | 1        | 1            | 1        | 1        | 1        |
|      | 1.019512 | 0.97807     | 0.995595 | 0.967742     | 0.977876 | 0.989744 | 0.979339 |
|      | 0.878049 | 0.811404    | 0.788546 | 0.842742     | 0.880531 |          |          |
|      |          |             |          |              |          | 0.964103 | 0.88843  |

|  |         |          |           |              |         |          |           |
|--|---------|----------|-----------|--------------|---------|----------|-----------|
|  | Vaccine |          |           | Convalescent |         |          |           |
|  | WA1+PBS | WA1+aCD8 | B.1.351+P | B.1.351+a    | WA1+PBS | WA1+aCD8 | B.1.351+P |
|  | 0       | 0        | 0         | 0            | 0       | 0        | 0         |
|  | 0       | 0        | 0         | 0            | 0       | 0        | 0         |
|  | 0       | 0        | 0         | 0            | 0       | 0        | 0         |
|  | 0       | 0        | 0         | 0            | 0       | 0        | 0         |
|  | 0       | 0        | 0         | 0            | 0       | 0        | 0         |
|  |         |          |           | 0            |         | 0        | 0         |

|          |             |          |          |          |          |          |
|----------|-------------|----------|----------|----------|----------|----------|
|          | B.1.351+PBS |          |          |          |          |          |
| 9.561222 | 9.249889    | 9.486547 | 9.332676 | 9.241072 | 5.250197 | 4.954654 |

B.1.351+PBS

6.414973 7.361728 7.662758 7.556303 7.39794 0 0

|  |       |              |       |       |       |       |       |
|--|-------|--------------|-------|-------|-------|-------|-------|
|  |       | Convalescent |       |       |       |       |       |
|  | 12.91 | 12.77        | 11.83 | 13.83 | 13.62 | 12.05 | 12.38 |

|                 |         |
|-----------------|---------|
|                 | P value |
| WA1             | 0.004   |
| Control         | 0.0006  |
| Percent B.1.351 | 0.0006  |
| Percent B.1.351 | 0.004   |

|            |          |          |          |          |          |          |
|------------|----------|----------|----------|----------|----------|----------|
| WA1+PBS    |          |          |          | WA1+aCD8 |          |          |
| 1          | 1        | 1        | 1        | 1        | 1        | 1        |
| 0.99537037 | 1.024155 | 1.018957 | 0.977376 | 1.014493 | 0.961722 | 0.982222 |

|            |          |          |          |          |          |          |
|------------|----------|----------|----------|----------|----------|----------|
| 0.97685185 | 1.024155 | 1.014218 | 1.022624 | 1.024155 | 0.995215 | 0.977778 |
|------------|----------|----------|----------|----------|----------|----------|

B.1.351+aCD8

0  
0  
0  
0  
0  
0

|            |          |          |          |          |          |          |
|------------|----------|----------|----------|----------|----------|----------|
| WA1+PBS    |          |          |          | WA1+aCD8 |          |          |
| 4.64275579 | 5.086929 | 5.043085 | 5.160081 | 3.982399 | 4.564423 | 5.140078 |

WA1+PBS  
0

0

0

0

WA1+aCD8  
0

0

0

P valuse  
<0.0001

| Vaccine  |          | B.1.351+PBS |          |          |          |          |
|----------|----------|-------------|----------|----------|----------|----------|
| 1        | 1        | 1           | 1        | 1        | 1        | 1        |
| 0.991111 | 1        | 0.99095     | 1.027523 | 1.02834  | 1.045872 | 1.005076 |
| 0.995556 | 0.990385 | 0.972851    | 1.036697 | 0.995951 | 1.050459 | 0.969543 |

| Convalescent |          | B.1.351+PBS |          |         |          |          |
|--------------|----------|-------------|----------|---------|----------|----------|
| 4.339932     | 7.296661 | 5.360184    | 6.016225 | 5.53907 | 5.469254 | 6.911048 |

Convalescent

0

0

B.1.351+PBS

0

0

0

0

0

B.1.351+aCD8

|          |          |          |          |          |          |          |
|----------|----------|----------|----------|----------|----------|----------|
| 1        | 1        | 1        | 1        | 1        | 1        | 1        |
| 1.009709 | 1        | 0.990521 | 1.011299 | 0.985437 | 0.984709 | 1.006873 |
|          |          |          |          |          | 0.941896 | 1.010309 |
| 1.009709 | 1.028302 | 1.023697 | 1.011299 | 0.980583 | 0.926606 | 1.017182 |

B.1.351+aCD8

WT+PBS

|         |          |          |          |          |          |          |
|---------|----------|----------|----------|----------|----------|----------|
| 7.95591 | 7.249318 | 5.902623 | 6.903139 | 4.731849 | 4.863409 | 5.129359 |
|---------|----------|----------|----------|----------|----------|----------|

B.1.351+aCD8

0

0

0

0

0

WT+PBS

0

0

| WA1+PBS  |          |          |          |          | WA1+aCD8 |          |
|----------|----------|----------|----------|----------|----------|----------|
| 1        | 1        | 1        | 1        | 1        | 1        | 1        |
| 1.007519 | 1        | 0.956835 | 0.993884 | 0.986014 | 0.960784 | 1.003509 |
| 0.969925 | 1.003636 | 1        | 0.963303 | 1.027972 | 0.980392 | 1.017544 |
| 1.003759 | 0.996364 | 1.07554  | 0.972477 | 1.034965 | 0.986928 | 1.059649 |

| WT+aCD8  |         |          |          |          | Vaci     |          |
|----------|---------|----------|----------|----------|----------|----------|
| 4.751935 | 6.13055 | 5.896455 | 4.573906 | 4.701049 | 4.548841 | 4.582514 |

0 0 0 0 WT+aCD8 0 0 0 Vac

Convalescent

B.1.351+PBS

1 1 1 1 1 1 1

0.9967 0.985251 1.002809 0.997333 0.992754 1 0.973244

0.990099 0.979351 1.005618 0.994667 0.98913 0.982456 0.979933

0.986799 0.979351 1.008427 1.005333 1.01087 1.003509 1.026756

cine

SA+PBS

6.590794 6.708452 6.266094 7.87935 7.434901 6.40057 6.598809

cine

0

0

SA+PBS

0

0

0

0

0

B.1.351+aCD8

|          |          |         |          |          |          |          |   |
|----------|----------|---------|----------|----------|----------|----------|---|
| 1        | 1        | 1       | 1        | 1        | 1        | 1        | 1 |
| 1.384921 | 0.980831 | 1.03321 | 1        | 0.992647 | 0.996644 | 1.007117 |   |
| 1.392857 | 0.990415 | 1.00369 | 1.007547 | 1.003676 | 0.983221 | 1.007117 |   |
| 1.416667 | 0.977636 | 1.00738 | 1.041509 | 1.051471 | 1        | 1.024911 |   |

SA+aCD8

6.924985 6.938889 6.654594

SA+aCD8

0

0

0

**Fig S1A**

|             |           |        | aCD8   |        |        |        |
|-------------|-----------|--------|--------|--------|--------|--------|
|             | 5.2983174 | 3.4    | 3.3664 | 3.3495 | 3.3553 | 2.794  |
|             | 6.3969297 | 3.4245 | 3.3815 | 3.4276 | 3.4399 | 1.8158 |
|             | 7.4955419 | 3.357  | 3.1794 | 3.3272 | 3.3945 | 0.6876 |
|             | 8.5941542 | 3.251  | 2.3695 | 3.0003 | 3.0964 | 0.2443 |
|             | 9.6927665 | 2.5775 | 1.1633 | 1.9621 | 2.6642 | 0.096  |
| LN dilution | 10.791379 | 1.385  | 0.5001 | 0.871  | 1.0377 | 0.0416 |

**Fig S1B**

|            |       |       | aCD8  |       |       |  |
|------------|-------|-------|-------|-------|-------|--|
| S1 IgG AUC | 16.48 | 13.21 | 15.19 | 16.25 | 4.682 |  |

**Fig S1C**

|             |           |        | aCD8   |        |        |        |
|-------------|-----------|--------|--------|--------|--------|--------|
|             | 5.2983174 | 3.3843 | 3.3796 | 3.5064 | 3.5186 | 3.3374 |
|             | 6.3969297 | 3.5333 | 3.4407 | 3.5251 | 3.5151 | 3.0498 |
|             | 7.4955419 | 3.3776 | 3.4613 | 3.4781 | 3.522  | 1.6402 |
|             | 8.5941542 | 3.3425 | 3.1348 | 3.306  | 3.4052 | 0.6806 |
|             | 9.6927665 | 2.995  | 1.7512 | 2.4319 | 2.7144 | 0.2491 |
| LN dilution | 10.791379 | 1.6608 | 0.7889 | 1.1326 | 1.3474 | 0.0864 |

**Fig S1D**

|             |       |       | aCD8  |       |       |  |
|-------------|-------|-------|-------|-------|-------|--|
| RBD IgG AUC | 17.33 | 15.24 | 16.55 | 17.13 | 8.055 |  |

| aCD4   |        |        |        | aCD4/aCD8 |        |        |
|--------|--------|--------|--------|-----------|--------|--------|
| 3.0794 | 2.4109 | 2.9741 | 1.3015 | 0.5918    | 0.047  | 0.1184 |
| 2.6488 | 1.1983 | 1.9902 | 0.5191 | 0.2349    | 0.0232 | 0.0618 |
| 1.1835 | 0.4589 | 0.5309 | 0.1945 | 0.0892    | 0.0151 | 0.0274 |
| 0.4414 | 0.2506 | 0.3212 | 0.0771 | 0.0382    | 0.0127 | 0.0168 |
| 0.1688 | 0.0937 | 0.119  | 0.035  | 0.0206    | 0.012  | 0.0138 |
| 0.0677 | 0.0474 | 0.0441 | 0.019  | 0.0156    | 0.0117 | 0.0112 |

| aCD4  |       |       |       | aCD4/aCD8 |        |        |
|-------|-------|-------|-------|-----------|--------|--------|
| 6.609 | 3.549 | 4.911 | 1.632 | 0.7543    | 0.1015 | 0.2028 |

| aCD4   |        |        |        | aCD4/aCD8 |        |        |
|--------|--------|--------|--------|-----------|--------|--------|
| 3.369  | 3.2737 | 3.3793 | 2.2753 | 0.1295    | 0.2702 | 1.2344 |
| 3.4369 | 2.4983 | 2.199  | 0.955  | 0.0536    | 0.0817 | 0.5996 |
| 2.7796 | 0.7357 | 1.0525 | 0.3795 | 0.0269    | 0.0313 | 0.2198 |
| 1.4602 | 0.2845 | 0.3436 | 0.1353 | 0.0173    | 0.0199 | 0.1029 |
| 0.4002 | 0.1742 | 0.1024 | 0.0536 | 0.0125    | 0.0149 | 0.0513 |
| 0.1345 | 0.0271 | 0.0426 | 0.046  | 0.0279    | 0.0131 | 0.017  |

| aCD4 |      |       |       | aCD4/aCD8 |       |       |
|------|------|-------|-------|-----------|-------|-------|
| 10.8 | 5.87 | 5.942 | 2.949 | 0.2076    | 0.318 | 1.757 |

|        |        |        |
|--------|--------|--------|
|        | PBS    |        |
| 3.3294 | 3.404  | 3.402  |
| 3.4305 | 3.2786 | 3.2933 |
| 3.4057 | 2.9999 | 3.2401 |
| 2.9919 | 1.7404 | 3.1521 |
| 1.8736 | 0.7623 | 1.8814 |
| 0.8461 | 0.3145 | 1.2522 |

|       |     |       |       |                        |         |
|-------|-----|-------|-------|------------------------|---------|
| 15.15 | PBS | 11.69 | 15.26 |                        | P Value |
|       |     |       |       | PBS vs. $\alpha$ CD8   | 0.6516  |
|       |     |       |       | PBS vs. $\alpha$ CD4   | <0.0001 |
|       |     |       |       | PBS vs. $\alpha$ CD8/4 | <0.0001 |

|        |        |        |
|--------|--------|--------|
|        | PBS    |        |
| 3.4369 | 3.4252 | 3.4997 |
| 3.4614 | 3.4286 | 3.4484 |
| 3.5723 | 3.3393 | 3.4125 |
| 3.4076 | 2.7383 | 3.2917 |
| 2.2737 | 0.9657 | 2.6998 |
| 0.2941 | 0.1805 | 1.0231 |

|       |     |       |      |                        |         |
|-------|-----|-------|------|------------------------|---------|
| 16.02 | PBS | 13.49 | 16.6 |                        | P Value |
|       |     |       |      | PBS vs. $\alpha$ CD8   | 0.7766  |
|       |     |       |      | PBS vs. $\alpha$ CD4   | 0.0003  |
|       |     |       |      | PBS vs. $\alpha$ CD8/4 | <0.0001 |

**Fig S2A**

|                 | Infection |      |      | Vaccine |      |      |
|-----------------|-----------|------|------|---------|------|------|
| IV <sup>-</sup> | 1.89      | 5.76 | 2.64 | 0.4     | 0.44 | 0.33 |
| IV <sup>+</sup> | 0.48      | 1.02 | 0.58 | 1.66    | 0.94 | 1.08 |

**Fig S2C**

|                 | Infection |      |      | Vaccine |      |      |
|-----------------|-----------|------|------|---------|------|------|
| IV <sup>-</sup> | 57.8      | 50.1 | 56.3 | 3.39    | 4.89 | 5.91 |
| IV <sup>+</sup> | 4.47      | 3.53 | 4.82 | 6.25    | 10.9 | 17.3 |

**Fig S2E**

|  |       |       |       |       |       |       |
|--|-------|-------|-------|-------|-------|-------|
|  | 3.377 | 2.244 | 3.896 | 2.432 | 2.784 | 2.529 |
|--|-------|-------|-------|-------|-------|-------|

P value  
0.0153  
0.7999

P value  
<0.0001  
0.0714

2.923      2.389      0.8971      Infection      2.276      2.643      1.787      2.377

1.398

1.601

3.691

4.134

2.911

1.794

4.724

4.054

3.274

3.333

3.219

3.665

|       |         |       |       |       |       |       |
|-------|---------|-------|-------|-------|-------|-------|
|       | Vaccine |       |       |       |       |       |
| 2.924 | 3.53    | 1.938 | 2.791 | 3.559 | 2.996 | 3.636 |

1.674

2.923

2.611

3.246

2.889

4.217

P value

0.0352

Individual values on figure

**Fig S4A**

|  | WA1+PBS  |          | Naïve (4 DPI) |          | WA1+aCD8 |          | B.1.35 |  |
|--|----------|----------|---------------|----------|----------|----------|--------|--|
|  | 7.87E+09 | 9.13E+09 | 8.81E+09      | 7.87E+09 | 7.87E+09 | 8.01E+09 |        |  |

**Fig S4B**

|  | WA1+PBS  |          |          |          |          |          |
|--|----------|----------|----------|----------|----------|----------|
|  | 3.211012 | 3.211012 | 3.211012 | 3.211012 | 3.211012 | 3.211012 |

**Fig S4C**

|  | WA1+PBS  |         |        |          |          |          |
|--|----------|---------|--------|----------|----------|----------|
|  | 4.223789 | 4.61719 | 4.4357 | 4.469032 | 4.290527 | 4.340033 |



S  
4.210116 3.211012 4.760936 4.189638 3.688877 4.713337 3.96642

B.1.351+aCD8

B.1.351+PBS  
5.055932 5.068755 5.171346 5.051298 5.223724 5.621694 5.045423

B.1.351

|          |  |  |                             |         |
|----------|--|--|-----------------------------|---------|
|          |  |  |                             | P value |
|          |  |  | WA1+PBS vs WA1+aCD8         | 0.9944  |
| 6.092556 |  |  | WA1+PBS vs B.1.351+PBS      | 0.1294  |
|          |  |  | WA1+aCD8 vs B.1.351+aCD8    | 0.014   |
|          |  |  | B.1.351+PBS vs B.1.351+aCD8 | 0.5774  |

|          |          |          |                             |  |         |
|----------|----------|----------|-----------------------------|--|---------|
| +aCD8    |          |          |                             |  | P value |
| 5.366065 | 5.407795 | 5.050766 | WA1+PBS vs WA1+aCD8         |  | 0.8814  |
|          |          |          | WA1+PBS vs B.1.351+PBS      |  | 0.0003  |
|          |          |          | WA1+aCD8 vs B.1.351+aCD8    |  | <0.0001 |
|          |          |          | B.1.351+PBS vs B.1.351+aCD8 |  | 0.4689  |
